# Supplementary material for: Comparative Profiling of Primary Colorectal Carcinomas and Liver Metastases Identifies LEF1 as a Prognostic Biomarker
Source: PLoS One. 2011 Feb 24;6(2):e16636. doi: 10.1371/journal.pone.0016636 (PMC3044708; doi:10.1371/journal.pone.0016636)
Supplement: Table S1 — Summary of clinical characteristics of CRC cohorts. (XLS) [file pone.0016636.s001.xls]

## Sheet: Table S1
Supplementary Table 1. Summary of clinical characteristics of CRC cohorts
	Gene expression profiling			Tissue microarray
	Primary colon cancer	Colon cancer with liver metastasis			P value
Number of cases	30	31		154
Age, median (range)	63 (36 – 80)	57 (40 – 82)		62 (27 – 92)	0.61
N (%), age </= 50	5 (17)	8 (26)		38 (25)
N (%), age > 50	25 (83)	23 (74)		116 (75)
Sex, N (%)					0.66
Male	14 (47)	16 (52)		84 (54)
Female	16 (63)	15 (48)		70 (45)
Stage					0.36 *
I	1	0		26**
II	10	0		46**
III	11	0		38**
IV	8	31 (100)		44**
* Comparison between primary colon cancer and tissue microarray groups
** 30 of 44 (68%) stage IV patients presented with liver metastasis. During follow-up, one of 26 stage I, 2 of 46 stage II and 4 of 38 stage III patients were diagnosed with recurrence involving liver, rendering a total of 37 (24%) with liver metastasis in our cohort.
