# Supplementary material for: Comparative Profiling of Primary Colorectal Carcinomas and Liver Metastases Identifies LEF1 as a Prognostic Biomarker
Source: PLoS One. 2011 Feb 24;6(2):e16636. doi: 10.1371/journal.pone.0016636 (PMC3044708; doi:10.1371/journal.pone.0016636)
Supplement: Table S2 — Ranked list of significant (FDR<0.005%) SAM genes (Student's t-test) upregulated in CLM vs. primary CRC and normal liver. (XLS) [file pone.0016636.s002.xls]

## Sheet: Table S2
Supplementary Table 2. Ranked list of significant (FDR<0.005%) SAM genes (Student's t-test) upregulated in CLM vs. primary CRC and normal liver
Clone ID	Symbol	Name
IMAGE:378461	SPP1	Secreted phosphoprotein 1 (osteopontin, bone sialoprotein I, early T-lymphocyte activation 1)
IMAGE:753931	CXCR4	Chemokine (C-X-C motif) receptor 4
IMAGE:512417	GPNMB	Glycoprotein (transmembrane) nmb
IMAGE:345849	LOX	Lysyl oxidase
IMAGE:504226	CD53	CD53 antigen
IMAGE:343867	AIF1	Allograft inflammatory factor 1
IMAGE:841332	ARHGDIB	Rho GDP dissociation inhibitor (GDI) beta
IMAGE:685801	SLC12A2	Solute carrier family 12 (sodium/potassium/chloride transporters), member 2
IMAGE:703581	PRG1	Proteoglycan 1, secretory granule
IMAGE:293917	SPARC	Secreted protein, acidic, cysteine-rich (osteonectin)
IMAGE:377560	CD3D	CD3D antigen, delta polypeptide (TiT3 complex)
IMAGE:487878	SPARC	Secreted protein, acidic, cysteine-rich (osteonectin)
IMAGE:298104	DZIP1	DAZ interacting protein 1
IMAGE:375834	LOX	Lysyl oxidase
IMAGE:796398	PEG3	Paternally expressed 3
IMAGE:345616	GPNMB	Glycoprotein (transmembrane) nmb
IMAGE:194965	FYB	FYN binding protein (FYB-120/130)
IMAGE:878596	ITM2A	Integral membrane protein 2A
IMAGE:815774	SLA	Src-like-adaptor
IMAGE:80796	IGLC2	Immunoglobulin lambda constant 1 (Mcg marker)
IMAGE:549221	MGP	Matrix Gla protein
IMAGE:250654	SPARC	Secreted protein, acidic, cysteine-rich (osteonectin)
IMAGE:213502	CD53	CD53 antigen
IMAGE:79629	CXCR4	Chemokine (C-X-C motif) receptor 4
IMAGE:155620	IGLC2	**Immunoglobulin lambda constant 1 (Mcg marker)
IMAGE:347036	LEF1	Lymphoid enhancer-binding factor 1
IMAGE:487793	MAF	V-maf musculoaponeurotic fibrosarcoma oncogene homolog (avian)
IMAGE:244189	FOLH1	**Prostate-specific membrane antigen-like
IMAGE:307741	RAG1	Recombination activating gene 1
IMAGE:154809	IGLC2	**Immunoglobulin lambda constant 1 (Mcg marker)
IMAGE:462007	IGSF1	Immunoglobulin superfamily, member 1
IMAGE:46827	VAV3	Vav 3 oncogene
IMAGE:586706	CEACAM5	Carcinoembryonic antigen-related cell adhesion molecule 5
IMAGE:74537	AFP	Alpha-fetoprotein
IMAGE:470546	SPARC	**Secreted protein, acidic, cysteine-rich (osteonectin)
IMAGE:34795	DAZAP2	DAZ associated protein 2
IMAGE:949939	PGK1	Phosphoglycerate kinase 1
IMAGE:66560	IGLC2	Immunoglobulin lambda joining 3
IMAGE:137984	FLJ38507	Vestigial-like 3
IMAGE:248463	HBZ	Hemoglobin mu chain
IMAGE:773976	FABP7	Fatty acid binding protein 7, brain
IMAGE:813254	F2R	Coagulation factor II (thrombin) receptor
IMAGE:45934	PAG	Phosphoprotein associated with glycosphingolipid microdomains 1
IMAGE:293925	LYZ	Lysozyme (renal amyloidosis)
IMAGE:245277	ITM2A	Integral membrane protein 2A
IMAGE:271952	ARL7	ADP-ribosylation factor-like 7
IMAGE:428100	SFRP1	Secreted frizzled-related protein 1
IMAGE:52430	SALL2	Sal-like 2 (Drosophila)
IMAGE:731308	CS	Citrate synthase
IMAGE:221828	KIF1A	Kinesin family member 1A
IMAGE:415229	VAV3	Vav 3 oncogene
IMAGE:774181	TIMP3	TIMP metallopeptidase inhibitor 3 (Sorsby fundus dystrophy, pseudoinflammatory)
IMAGE:878564	GPC3	Glypican 3
IMAGE:1326920	CALCRL	Calcitonin receptor-like
IMAGE:298118	DOCK2	Dedicator of cytokinesis 2
IMAGE:786657	CYP1B1	Cytochrome P450, family 1, subfamily B, polypeptide 1
IMAGE:23794	RAB11FIP3	RAB11 family interacting protein 3 (class II)
IMAGE:399898	CSPG2	Chondroitin sulfate proteoglycan 2 (versican)
IMAGE:243549	MYB	V-myb myeloblastosis viral oncogene homolog (avian)
IMAGE:136169	SAMSN1	SAM domain, SH3 domain and nuclear localisation signals, 1
IMAGE:769028	MEOX1	Mesenchyme homeo box 1
IMAGE:259591	PSG3	Pregnancy specific beta-1-glycoprotein 3
IMAGE:258120	COX7B	**Cytochrome c oxidase subunit VIIb
IMAGE:1160615	SIP1	Survival of motor neuron protein interacting protein 1
IMAGE:359982
IMAGE:590264	MGP	Matrix Gla protein
IMAGE:80643	EDIL3	EGF-like repeats and discoidin I-like domains 3
IMAGE:815539	LRMP	Lymphoid-restricted membrane protein
IMAGE:462113	ARID3A	AT rich interactive domain 3A (BRIGHT- like)
IMAGE:138991	COL6A3	Collagen, type VI, alpha 3
IMAGE:567265	SURB7	SRB7 suppressor of RNA polymerase B homolog (yeast)
IMAGE:123755	ERG	V-ets erythroblastosis virus E26 oncogene like (avian)
IMAGE:487513	CTGF	Connective tissue growth factor
IMAGE:344134	IGLL1	Immunoglobulin lambda-like polypeptide 1
IMAGE:271985	TYR	**Tyrosinase (oculocutaneous albinism IA)
IMAGE:430968	ENPP3	Ectonucleotide pyrophosphatase/phosphodiesterase 3
IMAGE:740851	SLIT2	Slit homolog 2 (Drosophila)
IMAGE:160488		5.5 kb mRNA upregulated in retinoic acid treated HL-60 neutrophilic cells
IMAGE:138139	HMGN1	**High-mobility group nucleosome binding domain 1
IMAGE:824340	NCF1	Neutrophil cytosolic factor 1 (47kDa, chronic granulomatous disease, autosomal 1)
IMAGE:878182	A2M	Alpha-2-macroglobulin
IMAGE:377701	CSPG2	Chondroitin sulfate proteoglycan 2 (versican)
IMAGE:797059	NAP1L3	Nucleosome assembly protein 1-like 3
IMAGE:854284	HEM1	NCK-associated protein 1-like
IMAGE:325160	TAGLN3	Transgelin 3
IMAGE:813823	LUM	Lumican
IMAGE:199635	PSG1	Pregnancy specific beta-1-glycoprotein 1
IMAGE:380890	FAM46C	Family with sequence similarity 46, member C
IMAGE:509760	TRIM31	Tripartite motif-containing 31
IMAGE:112565
IMAGE:196488	P2RY5	Purinergic receptor P2Y, G-protein coupled, 5
IMAGE:178922	C9orf58	Chromosome 9 open reading frame 58
IMAGE:344589	LCP1	Lymphocyte cytosolic protein 1 (L-plastin)
IMAGE:897678	PEG10	**Paternally expressed 10
IMAGE:667482	MAL	Mal, T-cell differentiation protein
IMAGE:46180	RARB	Retinoic acid receptor, beta
IMAGE:429300
IMAGE:52996	CHST10	Carbohydrate sulfotransferase 10
IMAGE:773330	GPNMB	Glycoprotein (transmembrane) nmb
IMAGE:51178	ELMO1	Engulfment and cell motility 1 (ced-12 homolog, C. elegans)
IMAGE:782730	ALDH1A2	Aldehyde dehydrogenase 1 family, member A2
IMAGE:41822	TRPS1	Trichorhinophalangeal syndrome I
IMAGE:229365	PTPRC	Protein tyrosine phosphatase, receptor type, C
IMAGE:687990	ARHGEF6	Rac/Cdc42 guanine nucleotide exchange factor (GEF) 6
IMAGE:1870935	FN1	Fibronectin 1
IMAGE:486591	SEMA3C	Sema domain, immunoglobulin domain (Ig), short basic domain, secreted, (semaphorin) 3C
IMAGE:823779	PLEK	Pleckstrin
IMAGE:289057	C3orf14	Chromosome 3 open reading frame 14
IMAGE:306841		T cell receptor beta chain (TCRB)
IMAGE:1926620	THY1	Thy-1 cell surface antigen
IMAGE:141589		Transcribed locus, strongly similar to NP_115887.1 homeobox protein from AL590526 [Homo sapiens]
IMAGE:149547	GNB4	Guanine nucleotide binding protein (G protein), beta polypeptide 4
IMAGE:1384851	MMP10	Matrix metallopeptidase 10 (stromelysin 2)
IMAGE:486676	LCP1	Lymphocyte cytosolic protein 1 (L-plastin)
IMAGE:824602	IFI16	Interferon, gamma-inducible protein 16
IMAGE:360025	SAMSN1	SAM domain, SH3 domain and nuclear localisation signals, 1
IMAGE:868169	LPL	Lipoprotein lipase
IMAGE:897910	POSTN	Periostin, osteoblast specific factor
IMAGE:839101	GJA1	Gap junction protein, alpha 1, 43kDa (connexin 43)
IMAGE:668685	IGFBP1	Insulin-like growth factor binding protein 1
IMAGE:813614	SPRR1B	Small proline-rich protein 1B (cornifin)
IMAGE:30175	PTPRO	Protein tyrosine phosphatase, receptor type, O
IMAGE:754582	EVI2A	Ecotropic viral integration site 2A
IMAGE:611189	CDH4	Cadherin 4, type 1, R-cadherin (retinal)
IMAGE:1869870	ENDOGL1	**Endonuclease G-like 1
IMAGE:67759	ALOX5AP	Arachidonate 5-lipoxygenase-activating protein
IMAGE:823679	C18orf1	Chromosome 18 open reading frame 1
IMAGE:204545	ANTXR1	Anthrax toxin receptor 1
IMAGE:1634992	LOC153328	Similar to CG4995 gene product
IMAGE:299347		Full-length cDNA clone CS0DJ012YN23 of T cells (Jurkat cell line) Cot 10-normalized of Homo sapiens (human)
IMAGE:768508	DPPA4	Developmental pluripotency associated 4
IMAGE:117806	IGJ	Immunoglobulin J polypeptide, linker protein for immunoglobulin alpha and mu polypeptides
IMAGE:253507	MED12L	Mediator of RNA polymerase II transcription, subunit 12 homolog (yeast)-like
IMAGE:300973	CD8A	CD8 antigen, alpha polypeptide (p32)
IMAGE:347035	KIAA0476	KIAA0476
IMAGE:151201	ALOX5AP	Arachidonate 5-lipoxygenase-activating protein
IMAGE:325070	GFM1	**G elongation factor, mitochondrial 1
IMAGE:139009	FN1	Fibronectin 1
IMAGE:22161	LOC401152	HCV F-transactivated protein 1
IMAGE:46173	SPON1	Spondin 1, extracellular matrix protein
IMAGE:753313	LAPTM5	Lysosomal associated multispanning membrane protein 5
IMAGE:141361	LOC51334	Mesenchymal stem cell protein DSC54
IMAGE:502155	PTGIS	Prostaglandin I2 (prostacyclin) synthase
IMAGE:52066	FLJ30834	Hypothetical protein FLJ30834
IMAGE:242952	ILF2	Interleukin enhancer binding factor 2, 45kDa
IMAGE:489631	CSPG2	Chondroitin sulfate proteoglycan 2 (versican)
IMAGE:272200	SH3MD1	SH3 multiple domains 1
IMAGE:824531	PSCDBP	Pleckstrin homology, Sec7 and coiled-coil domains, binding protein
IMAGE:759948	S100B	S100 calcium binding protein, beta (neural)
IMAGE:302286	WNT2	Wingless-type MMTV integration site family member 2
IMAGE:199367
IMAGE:51363	CD200	CD200 antigen
IMAGE:266361	MLANA	Melan-A
IMAGE:416280	MYB	V-myb myeloblastosis viral oncogene homolog (avian)
IMAGE:491186		CDNA: FLJ23131 fis, clone LNG08502
IMAGE:236124	IGLC2	**Immunoglobulin lambda joining 3
IMAGE:46452	BCL11B	B-cell CLL/lymphoma 11B (zinc finger protein)
IMAGE:143887	PRSS23	Protease, serine, 23
IMAGE:841149	TGFBR2	Transforming growth factor, beta receptor II (70/80kDa)
IMAGE:37234	MAP4K2	Mitogen-activated protein kinase kinase kinase kinase 2
IMAGE:151055	ELOVL5	ELOVL family member 5, elongation of long chain fatty acids (FEN1/Elo2, SUR4/Elo3-like, yeast)
IMAGE:2028954	TUB	Tubby homolog (mouse)
IMAGE:50842	LRAP	Leukocyte-derived arginine aminopeptidase
IMAGE:25718	BFAR	Bifunctional apoptosis regulator
IMAGE:768638	SLC15A2	Solute carrier family 15 (H+/peptide transporter), member 2
IMAGE:299394		Homo sapiens, clone IMAGE:4690669, mRNA
IMAGE:823562	CDO1	Cysteine dioxygenase, type I
IMAGE:772425	FAP	Fibroblast activation protein, alpha
IMAGE:178255	ST5	Suppression of tumorigenicity 5
IMAGE:121136	C8orf13	Chromosome 8 open reading frame 13
IMAGE:213917	DOCK2	Dedicator of cytokinesis 2
IMAGE:123474	SCD	Stearoyl-CoA desaturase (delta-9-desaturase)
IMAGE:281100	SYT6	Synaptotagmin VI
IMAGE:898092	CTGF	Connective tissue growth factor
IMAGE:123666	GPR109B	G protein-coupled receptor 109B
IMAGE:309826	LAMA4	Laminin, alpha 4
IMAGE:241432	C5orf13	Chromosome 5 open reading frame 13
IMAGE:840511	VIM	Vimentin
IMAGE:292171	MGC13204	Hypothetical protein MGC13204
IMAGE:773479		Hypothetical gene LOC92755
IMAGE:950381	RPL18A	**Ribosomal protein L18a
IMAGE:244355	IL2RG	Interleukin 2 receptor, gamma (severe combined immunodeficiency)
IMAGE:244703	ITGBL1	Integrin, beta-like 1 (with EGF-like repeat domains)
IMAGE:292936	CDCA8	Cell division cycle associated 8
IMAGE:265645	HNMT	Histamine N-methyltransferase
IMAGE:814701	MAD2L1	MAD2 mitotic arrest deficient-like 1 (yeast)
IMAGE:246722	SERPINE2	Serpin peptidase inhibitor, clade E (nexin, plasminogen activator inhibitor type 1), member 2
IMAGE:151477	FLJ38507	Vestigial-like 3
IMAGE:415828	PAPPA	Pregnancy-associated plasma protein A, pappalysin 1
IMAGE:1035889	KRT4	Keratin 4
IMAGE:31093	CDH13	Cadherin 13, H-cadherin (heart)
IMAGE:785836		Unknown mRNA
IMAGE:358647		CDNA FLJ31683 fis, clone NT2RI2005353
IMAGE:489519	TIMP3	TIMP metallopeptidase inhibitor 3 (Sorsby fundus dystrophy, pseudoinflammatory)
IMAGE:324122	ESM1	Endothelial cell-specific molecule 1
IMAGE:1492230	EFEMP1	EGF-containing fibulin-like extracellular matrix protein 1
IMAGE:148352	ADAMTS5	ADAM metallopeptidase with thrombospondin type 1 motif, 5 (aggrecanase-2)
IMAGE:23073
IMAGE:50354	OTX2	Orthodenticle homolog 2 (Drosophila)
IMAGE:303109	P2RY5	Purinergic receptor P2Y, G-protein coupled, 5
IMAGE:609377	KAB	**KIAA0470-like
IMAGE:1610304		CDNA clone IMAGE:5262734
IMAGE:786283	SSBP2	Single-stranded DNA binding protein 2
IMAGE:123374	C1orf35	Chromosome 1 open reading frame 35
IMAGE:51331	MYO5A	Myosin VA (heavy polypeptide 12, myoxin)
IMAGE:491559	FABP3	Fatty acid binding protein 3, muscle and heart (mammary-derived growth inhibitor)
IMAGE:77193	MAFB	V-maf musculoaponeurotic fibrosarcoma oncogene homolog B (avian)
IMAGE:159608	APOD	Apolipoprotein D
IMAGE:208570	EXT1	Exostoses (multiple) 1
IMAGE:50443	MYH10	Myosin, heavy polypeptide 10, non-muscle
IMAGE:587847	GPX2	Glutathione peroxidase 2 (gastrointestinal)
IMAGE:244767	BRRN1	Barren homolog (Drosophila)
IMAGE:526657	TCEB3	Transcription elongation factor B (SIII), polypeptide 3 (110kDa, elongin A)
IMAGE:134916	PAPPA2	Pappalysin 2
IMAGE:502287	EMB	Embigin homolog (mouse)
IMAGE:590323	VIM	Vimentin
IMAGE:298963	MTA1	Metastasis associated 1
IMAGE:428804	LOC91464	RAX-like homeobox
IMAGE:429911
IMAGE:109316	SERPINA3	Serpin peptidase inhibitor, clade A (alpha-1 antiproteinase, antitrypsin), member 3
IMAGE:144797	ADAMTS1	ADAM metallopeptidase with thrombospondin type 1 motif, 1
IMAGE:307244	LIPL3	Lipase-like, ab-hydrolase domain containing 3
IMAGE:262920	H41	Hypothetical protein H41
IMAGE:325383	NXPH3	Neurexophilin 3
IMAGE:66457	P66beta	GATA zinc finger domain containing 2B
IMAGE:83011	RPS4Y1	Ribosomal protein S4, Y-linked 1
IMAGE:501854		CDNA clone IMAGE:4794726
IMAGE:51022	SIAT8B	ST8 alpha-N-acetyl-neuraminide alpha-2,8-sialyltransferase 2
IMAGE:283715	LCP2	Lymphocyte cytosolic protein 2 (SH2 domain containing leukocyte protein of 76kDa)
IMAGE:40887	LFNG	Lunatic fringe homolog (Drosophila)
IMAGE:52930	PLEKHC1	Pleckstrin homology domain containing, family C (with FERM domain) member 1
IMAGE:145292	COL4A1	Collagen, type IV, alpha 1
IMAGE:810372	PIK3CG	Phosphoinositide-3-kinase, catalytic, gamma polypeptide
IMAGE:361204	COL9A3	Collagen, type IX, alpha 3
IMAGE:163100		CDNA FLJ41771 fis, clone IMR322009807
IMAGE:965839	GFRA1	GDNF family receptor alpha 1
IMAGE:488404		CDNA FLJ12815 fis, clone NT2RP2002546
IMAGE:1010955	TARP	TCR gamma alternate reading frame protein
IMAGE:293339	SNAI2	Snail homolog 2 (Drosophila)
IMAGE:1075956		Transcribed locus
IMAGE:753301	CEACAM1	Carcinoembryonic antigen-related cell adhesion molecule 1 (biliary glycoprotein)
IMAGE:80109	HLA-DQA1	Major histocompatibility complex, class II, DQ alpha 1
IMAGE:282498	VGCNL1	Voltage gated channel like 1
IMAGE:472185	ADAMTS1	ADAM metallopeptidase with thrombospondin type 1 motif, 1
IMAGE:838736	DCBLD2	Discoidin, CUB and LCCL domain containing 2
IMAGE:140240	ROBO2	Roundabout, axon guidance receptor, homolog 2 (Drosophila)
IMAGE:810242	C3AR1	Complement component 3a receptor 1
IMAGE:1567985		Transcribed locus
IMAGE:358850	TMP21	Transmembrane emp24-like trafficking protein 10 (yeast)
IMAGE:42415	GLT25D2	Glycosyltransferase 25 domain containing 2
IMAGE:1594172	HSPC150	Ubiquitin-conjugating enzyme E2T (putative)
IMAGE:739155	CDH6	Cadherin 6, type 2, K-cadherin (fetal kidney)
IMAGE:950354	RAB27A	**RAB27A, member RAS oncogene family
IMAGE:41905	KCNK2	Potassium channel, subfamily K, member 2
IMAGE:809719	URB	Steroid sensitive gene 1
IMAGE:219929	PREX1	Phosphatidylinositol 3,4,5-trisphosphate-dependent RAC exchanger 1
IMAGE:40011	HAPIP	Kalirin, RhoGEF kinase
IMAGE:814478	BCL2A1	BCL2-related protein A1
IMAGE:826142	CHN2	Chimerin (chimaerin) 2
IMAGE:882510	KPNA2	Karyopherin alpha 2 (RAG cohort 1, importin alpha 1)
IMAGE:509688	CEACAM7	Carcinoembryonic antigen-related cell adhesion molecule 7
IMAGE:289645	APLP1	Amyloid beta (A4) precursor-like protein 1
IMAGE:593474	FLJ14959	Hypothetical protein FLJ14959
IMAGE:897531	MCAM	**Melanoma cell adhesion molecule
IMAGE:246079	ALS2CR3	**Amyotrophic lateral sclerosis 2 (juvenile) chromosome region, candidate 3
IMAGE:121251	MGC5576	Hypothetical protein MGC5576
IMAGE:245853	AP2B1	Adaptor-related protein complex 2, beta 1 subunit
IMAGE:163407	STOM	Stomatin
IMAGE:376643	FLJ38508	Aldehyde dehydrogenase 1 family, member L2
IMAGE:22374		Transcribed locus, moderately similar to NP_002645.3 pyruvate kinase 3 isoform 1; thyroid hormone-binding protein, cytosolic; PK, muscle type; OPA-interacting protein 3 [Homo sapiens]
IMAGE:810618	GLRB	Glycine receptor, beta
IMAGE:796268	PPP1R1A	Protein phosphatase 1, regulatory (inhibitor) subunit 1A
IMAGE:795544	WASPIP	Wiskott-Aldrich syndrome protein interacting protein
IMAGE:48060		Transcribed locus, moderately similar to XP_414124.1 PREDICTED: similar to KIAA0390 [Gallus gallus]
IMAGE:781089	PTTG3	**Pituitary tumor-transforming 3
IMAGE:296788	CTNNA1	Leucine rich repeat transmembrane neuronal 2
IMAGE:166934	PCDHGC3	Protocadherin gamma subfamily A, 12
IMAGE:306344	MAT2B	Methionine adenosyltransferase II, beta
IMAGE:214858	LDB2	LIM domain binding 2
IMAGE:1862450	SERPINA5	Serpin peptidase inhibitor, clade A (alpha-1 antiproteinase, antitrypsin), member 5
IMAGE:47186	PTPRD	Protein tyrosine phosphatase, receptor type, D
IMAGE:1087325
IMAGE:754358	SPOCK	Sparc/osteonectin, cwcv and kazal-like domains proteoglycan (testican)
IMAGE:488145	FPRL2	Formyl peptide receptor-like 2
IMAGE:730353	THEDC1	Thioesterase domain containing 1
IMAGE:51447	FCGR3A	Fc fragment of IgG, low affinity IIIa, receptor (CD16a)
IMAGE:155064	USP13	Ubiquitin specific peptidase 13 (isopeptidase T-3)
IMAGE:325365	HRB2	HIV-1 rev binding protein 2
IMAGE:110988		Transcribed locus
IMAGE:753069	MERTK	C-mer proto-oncogene tyrosine kinase
IMAGE:788234	ID4	Inhibitor of DNA binding 4, dominant negative helix-loop-helix protein
IMAGE:344139	DOC1	Downregulated in ovarian cancer 1
IMAGE:610362	HMMR	**Hyaluronan-mediated motility receptor (RHAMM)
IMAGE:220851	CRYAA	Crystallin, alpha A
IMAGE:299272		Transcribed locus
IMAGE:504431	PPP2R2C	Protein phosphatase 2 (formerly 2A), regulatory subunit B (PR 52), gamma isoform
IMAGE:868212	TGFBI	Transforming growth factor, beta-induced, 68kDa
IMAGE:190732	SLC2A5	Solute carrier family 2 (facilitated glucose/fructose transporter), member 5
IMAGE:470781	CDK6	Cyclin-dependent kinase 6
IMAGE:121981	SLC2A14	Solute carrier family 2 (facilitated glucose transporter), member 14
IMAGE:853066	CNAP1	Chromosome condensation-related SMC-associated protein 1
IMAGE:51950	AQP1	Aquaporin 1 (channel-forming integral protein, 28kDa)
IMAGE:1861777	SERPINA5	Serpin peptidase inhibitor, clade A (alpha-1 antiproteinase, antitrypsin), member 5
IMAGE:486394	FABP3	Fatty acid binding protein 3, muscle and heart (mammary-derived growth inhibitor)
IMAGE:80948	IGJ	Immunoglobulin J polypeptide, linker protein for immunoglobulin alpha and mu polypeptides
IMAGE:248371	SUMO1	SMT3 suppressor of mif two 3 homolog 1 (yeast)
IMAGE:31825	KIAA1906	KIAA1906 protein
IMAGE:810697	KATNB1	Katanin p80 (WD repeat containing) subunit B 1
IMAGE:290082	SUHW2	Suppressor of hairy wing homolog 2 (Drosophila)
IMAGE:47652	CECR6	Cat eye syndrome chromosome region, candidate 6
IMAGE:167041	ABCB8	ATP-binding cassette, sub-family B (MDR/TAP), member 8
IMAGE:47169	RNF24	Ring finger protein 24
IMAGE:487988	CORO1A	**Coronin, actin binding protein, 1A
IMAGE:120189	PSG1	Pregnancy specific beta-1-glycoprotein 1
IMAGE:260696	HRB2	HIV-1 rev binding protein 2
IMAGE:299781		Transcribed locus, moderately similar to XP_517655.1 PREDICTED: similar to KIAA0825 protein [Pan troglodytes]
IMAGE:593183	EVI2B	Ecotropic viral integration site 2B
IMAGE:686081	PTPN7	Protein tyrosine phosphatase, non-receptor type 7
IMAGE:270786	PLEKHB2	Pleckstrin homology domain containing, family B (evectins) member 2
IMAGE:767202	LTBP2	Latent transforming growth factor beta binding protein 2
IMAGE:307255	C1orf38	Chromosome 1 open reading frame 38
IMAGE:207562	MGC4796	Serine/threonine kinase 40
IMAGE:257634	C11ORF4	Chromosome 11 hypothetical protein ORF4
IMAGE:504421	ADFP	Adipose differentiation-related protein
IMAGE:756931	S100A1	S100 calcium binding protein A1
IMAGE:824109	ZFHX1B	Zinc finger homeobox 1b
IMAGE:296998	DO	Dombrock blood group
IMAGE:143287	PSG11	**Pregnancy specific beta-1-glycoprotein 11
IMAGE:179403	CYP2E1	Cytochrome P450, family 2, subfamily E, polypeptide 1
IMAGE:490819	GARP	Leucine rich repeat containing 32
IMAGE:627939	CSRP3	Cysteine and glycine-rich protein 3 (cardiac LIM protein)
IMAGE:50519	ARNTL	Aryl hydrocarbon receptor nuclear translocator-like
IMAGE:753467	SLC2A3	Solute carrier family 2 (facilitated glucose transporter), member 3
IMAGE:309929	GPR	Putative G protein coupled receptor
IMAGE:308415	MRPS15	**Mitochondrial ribosomal protein S15
IMAGE:222454	CMRF-35H	CD300A antigen
IMAGE:149895	CD47	CD47 antigen (Rh-related antigen, integrin-associated signal transducer)
IMAGE:41903	HEY1	Hairy/enhancer-of-split related with YRPW motif 1
IMAGE:49687	ADRBK2	Adrenergic, beta, receptor kinase 2
IMAGE:244310	CYBRD1	Cytochrome b reductase 1
IMAGE:2028711	PRKAA2	Protein kinase, AMP-activated, alpha 2 catalytic subunit
IMAGE:193386	CPB2	Carboxypeptidase B2 (plasma, carboxypeptidase U)
IMAGE:119384	CHIT1	Chitinase 1 (chitotriosidase)
IMAGE:31969
IMAGE:856135	SRPK1	SFRS protein kinase 1
IMAGE:1699118		SH3-domain GRB2-like 3
IMAGE:392405	IGSF4	Immunoglobulin superfamily, member 4
IMAGE:292736	H41	Hypothetical protein H41
IMAGE:128493	MLH1	MutL homolog 1, colon cancer, nonpolyposis type 2 (E. coli)
IMAGE:839081	ELOVL5	ELOVL family member 5, elongation of long chain fatty acids (FEN1/Elo2, SUR4/Elo3-like, yeast)
IMAGE:767365	CD109	CD109 antigen (Gov platelet alloantigens)
IMAGE:32304	CADPS	Ca2+-dependent secretion activator
IMAGE:796152	C14orf31	FERM domain containing 6
IMAGE:1739583	MFTC	Solute carrier family 25, member 32
IMAGE:223350	CP	Ceruloplasmin (ferroxidase)
IMAGE:460899	PLAGL2	Pleiomorphic adenoma gene-like 2
IMAGE:358433	RXRG	Retinoid X receptor, gamma
IMAGE:565624	LOC133619	Hypothetical protein MGC12103
IMAGE:140716	KIAA0265	KIAA0265 protein
IMAGE:127974	CLC	Charcot-Leyden crystal protein
IMAGE:31251	GPM6B	Glycoprotein M6B
IMAGE:359119	CKS2	CDC28 protein kinase regulatory subunit 2
IMAGE:1569397	LOC283824	Hypothetical protein LOC283824
IMAGE:837864	EDD	E3 ubiquitin protein ligase, HECT domain containing, 1
IMAGE:758298	TOX	Thymus high mobility group box protein TOX
IMAGE:284796		CDNA FLJ42788 fis, clone BRAWH3007129
IMAGE:193139	GAB1	GRB2-associated binding protein 1
IMAGE:1011706
IMAGE:183183	DRCTNNB1A	Down-regulated by Ctnnb1, a
IMAGE:471855	LUM	Lumican
IMAGE:293336		Hypothetical LOC339926
IMAGE:31478	KIAA0319	KIAA0319
IMAGE:627105	PIGN	Phosphatidylinositol glycan, class N
IMAGE:916041	FLJ12529	Pre-mRNA cleavage factor I, 59 kDa subunit
IMAGE:839736	CRYAB	Crystallin, alpha B
IMAGE:786073		Transcribed locus
IMAGE:212772	C13orf18	Chromosome 13 open reading frame 18
IMAGE:1048601	MGC39584	Hypothetical gene supported by BC029568
IMAGE:34345	NUP133	Nucleoporin 133kDa
IMAGE:469281	LLGL1	Lethal giant larvae homolog 1 (Drosophila)
IMAGE:128150	BIN2	Bridging integrator 2
IMAGE:731080	C13orf23	Chromosome 13 open reading frame 23
IMAGE:490995	PLOD2	Procollagen-lysine, 2-oxoglutarate 5-dioxygenase 2
IMAGE:841664	CAV1	Caveolin 1, caveolae protein, 22kDa
IMAGE:209176	C14orf143	Chromosome 14 open reading frame 143
IMAGE:359722	RHOJ	Ras homolog gene family, member J
IMAGE:838802	P4HA1	Procollagen-proline, 2-oxoglutarate 4-dioxygenase (proline 4-hydroxylase), alpha polypeptide I
IMAGE:1522233	RBMS3	RNA binding motif, single stranded interacting protein
IMAGE:200018	TCL1A	T-cell leukemia/lymphoma 1A
IMAGE:32241	NUPL1	Nucleoporin like 1
IMAGE:771000	MGC10433	Hypothetical protein MGC10433
IMAGE:139837	FLJ38507	Vestigial-like 3
IMAGE:757268	ACSL6	Acyl-CoA synthetase long-chain family member 6
IMAGE:82991	ENPP1	Ectonucleotide pyrophosphatase/phosphodiesterase 1
IMAGE:151418	MNAB	Membrane associated DNA binding protein
IMAGE:66902		CDNA FLJ32121 fis, clone PEBLM1000083
IMAGE:1441751	SYTL2	Synaptotagmin-like 2
IMAGE:701231	CRHBP	Corticotropin releasing hormone binding protein
IMAGE:450453	TTLL4	Tubulin tyrosine ligase-like family, member 4
IMAGE:29349
IMAGE:485989	CCL7	Chemokine (C-C motif) ligand 7
IMAGE:28218	GABRG2	Gamma-aminobutyric acid (GABA) A receptor, gamma 2
IMAGE:781047	BUB1	BUB1 budding uninhibited by benzimidazoles 1 homolog (yeast)
IMAGE:38582	KLHL3	Kelch-like 3 (Drosophila)
IMAGE:428936	DDEF1	DDEF1 intronic transcript 1
IMAGE:530814	SEPP1	Selenoprotein P, plasma, 1
IMAGE:45138	VEGFC	**Vascular endothelial growth factor C
IMAGE:796082	ALS2CR4	Amyotrophic lateral sclerosis 2 (juvenile) chromosome region, candidate 4
IMAGE:782581	DZIP1	DAZ interacting protein 1
IMAGE:220658	MSH2	MutS homolog 2, colon cancer, nonpolyposis type 1 (E. coli)
IMAGE:760299	DKK3	Dickkopf homolog 3 (Xenopus laevis)
IMAGE:50043	MBP	Myelin basic protein
IMAGE:28611	LOC286063	Hypothetical protein LOC286063
IMAGE:769686	THY1	Thy-1 cell surface antigen
IMAGE:305538	MRPL42	Mitochondrial ribosomal protein L42
IMAGE:199272	Cep192	Centrosomal protein 192 kDa
IMAGE:359933	GNAS	GNAS complex locus
IMAGE:232837	TPX2	TPX2, microtubule-associated, homolog (Xenopus laevis)
IMAGE:340722	MLF1	Myeloid leukemia factor 1
IMAGE:417202	KIAA0317	KIAA0317
IMAGE:280934	MVD	Mevalonate (diphospho) decarboxylase
IMAGE:878578	ALDOA	Aldolase A, fructose-bisphosphate
IMAGE:562983	RALBP1	RalA binding protein 1
IMAGE:77636	BHMT	Betaine-homocysteine methyltransferase
IMAGE:242797	WWTR1	WW domain containing transcription regulator 1
IMAGE:265102	ABI2	Abl interactor 2
IMAGE:857651	MAP2K2	Mitogen-activated protein kinase kinase 2
IMAGE:1049232		Transcribed locus
IMAGE:269293	FLJ12584	Armadillo repeat containing 9
IMAGE:235135	ITGA4	**Integrin, alpha 4 (antigen CD49D, alpha 4 subunit of VLA-4 receptor)
IMAGE:1015874	BARD1	BRCA1 associated RING domain 1
IMAGE:134482	KIAA1333	KIAA1333
IMAGE:39593	SST	Somatostatin
IMAGE:179804	PWP2H	PWP2 periodic tryptophan protein homolog (yeast)
IMAGE:754157	DRCTNNB1A	Down-regulated by Ctnnb1, a
IMAGE:325057		CDNA FLJ12815 fis, clone NT2RP2002546
IMAGE:768561	CCL2	Chemokine (C-C motif) ligand 2
IMAGE:414994	COL1A2	Collagen, type I, alpha 2
IMAGE:773568	POU4F1	POU domain, class 4, transcription factor 1
IMAGE:664121	LITAF	Lipopolysaccharide-induced TNF factor
IMAGE:30114	PHTF2	Putative homeodomain transcription factor 2
IMAGE:48886	MRC1L1	Mannose receptor, C type 1
IMAGE:366887	BMP7	Bone morphogenetic protein 7 (osteogenic protein 1)
IMAGE:208078	IMP-1	IGF-II mRNA-binding protein 1
IMAGE:625384	FSTL1	Follistatin-like 1
IMAGE:276519	CWF19L1	CWF19-like 1, cell cycle control (S. pombe)
IMAGE:41648	IL13RA2	Interleukin 13 receptor, alpha 2
IMAGE:260200	MNDA	Myeloid cell nuclear differentiation antigen
IMAGE:62263	ADAMTS1	ADAM metallopeptidase with thrombospondin type 1 motif, 1
IMAGE:1069393	EXT1	Exostoses (multiple) 1
IMAGE:563598	GABRP	Gamma-aminobutyric acid (GABA) A receptor, pi
IMAGE:129817	N4BP1	**Nedd4 binding protein 1
IMAGE:214068	GATA3	GATA binding protein 3
IMAGE:52057	LOC157503	Hypothetical protein LOC157503
IMAGE:1218102	TRPS1	Trichorhinophalangeal syndrome I
IMAGE:292806	CSE1L	CSE1 chromosome segregation 1-like (yeast)
IMAGE:325182	CDH2	Cadherin 2, type 1, N-cadherin (neuronal)
IMAGE:32683	LOC285513	Hypothetical protein LOC285513
IMAGE:39453	LASS6	LAG1 longevity assurance homolog 6 (S. cerevisiae)
IMAGE:344430	BMP7	Bone morphogenetic protein 7 (osteogenic protein 1)
IMAGE:744047	PLK1	Polo-like kinase 1 (Drosophila)
IMAGE:924007	MYC	V-myc myelocytomatosis viral oncogene homolog (avian)
IMAGE:1602730	ACOX2	Acyl-Coenzyme A oxidase 2, branched chain
IMAGE:39577		Transcribed locus
IMAGE:869466	BPI	Bactericidal/permeability-increasing protein
IMAGE:843041	PALM2-AKAP2	Paralemmin 2
IMAGE:511388	HECA	Headcase homolog (Drosophila)
IMAGE:488913	MFAP3	Microfibrillar-associated protein 3
IMAGE:233688	ADAM12	ADAM metallopeptidase domain 12 (meltrin alpha)
IMAGE:786308	CD4	CD4 antigen (p55)
IMAGE:29967	DACH1	Dachshund homolog 1 (Drosophila)
IMAGE:259350	C20orf43	Chromosome 20 open reading frame 43
IMAGE:282201	FEM1C	Fem-1 homolog c (C.elegans)
IMAGE:783697
IMAGE:50295	HSPA12A	Heat shock 70kDa protein 12A
IMAGE:251404		Transcribed locus
IMAGE:192481	NRXN2	Neurexin 2
IMAGE:684644	ZNF198	Zinc finger protein 198
IMAGE:713455		Transcribed locus
IMAGE:184240	ADAM11	ADAM metallopeptidase domain 11
IMAGE:758309	PRICKLE1	Prickle-like 1 (Drosophila)
IMAGE:235155	FCER1G	Fc fragment of IgE, high affinity I, receptor for; gamma polypeptide
IMAGE:503819	PRELP	Proline/arginine-rich end leucine-rich repeat protein
IMAGE:346308	FLJ13912	Hypothetical protein FLJ13912
IMAGE:753610	APOE	Apolipoprotein E
IMAGE:745138	LOC112714	Alpha-tubulin isotype H2-alpha
IMAGE:41940	CXorf1	**Chromosome X open reading frame 1
IMAGE:45929	TCF4	Transcription factor 4
IMAGE:767851	FBN1	Fibrillin 1 (Marfan syndrome)
IMAGE:301400	C6orf204	**Chromosome 6 open reading frame 204
IMAGE:589869	WWTR1	WW domain containing transcription regulator 1
IMAGE:429203	WDTC1	**WD and tetratricopeptide repeats 1
IMAGE:236142	E2F1	E2F transcription factor 1
IMAGE:627118	NS3TP1	HCV NS3-transactivated protein 1
IMAGE:788405	GAB1	GRB2-associated binding protein 1
IMAGE:838373	DHX9	DEAH (Asp-Glu-Ala-His) box polypeptide 9
IMAGE:1472753	LHFPL3	Lipoma HMGIC fusion partner-like 3
IMAGE:308038	DKFZp313N0621	**Chromosome 3 open reading frame 23
IMAGE:242687	B3GNT1	UDP-GlcNAc:betaGal beta-1,3-N-acetylglucosaminyltransferase 1
IMAGE:756376
IMAGE:795378	KIAA1238	Family with sequence similarity 80, member B
IMAGE:469969	ITGAV	Integrin, alpha V (vitronectin receptor, alpha polypeptide, antigen CD51)
IMAGE:811166	YWHAZ	Tyrosine 3-monooxygenase/tryptophan 5-monooxygenase activation protein, zeta polypeptide
IMAGE:208499
IMAGE:155716	NRG1	Neuregulin 1
IMAGE:50421	NDST3	N-deacetylase/N-sulfotransferase (heparan glucosaminyl) 3
IMAGE:1156515	MSH2	MutS homolog 2, colon cancer, nonpolyposis type 1 (E. coli)
IMAGE:727292	CD163	CD163 antigen
IMAGE:666377	ZNF161	Zinc finger protein 161
IMAGE:814595	PRKCBP1	Protein kinase C binding protein 1
IMAGE:814942	SMCY	Smcy homolog, Y-linked (mouse)
IMAGE:151261	XTP3TPA	XTP3-transactivated protein A
IMAGE:50922	LPPR4	Plasticity related gene 1
IMAGE:204257	ADAM9	ADAM metallopeptidase domain 9 (meltrin gamma)
IMAGE:1558376	DKFZp761D221	SH3-domain GRB2-like (endophilin) interacting protein 1
IMAGE:128617	FLJ21945	Hypothetical protein FLJ21945
IMAGE:271198	NR3C1	Nuclear receptor subfamily 3, group C, member 1 (glucocorticoid receptor)
IMAGE:179109	HEPH	Hephaestin
IMAGE:131016	RAB8B	RAB8B, member RAS oncogene family
IMAGE:298409	FABP3	Fatty acid binding protein 3, muscle and heart (mammary-derived growth inhibitor)
IMAGE:854581	TCF4	Transcription factor 4
IMAGE:344272	EMP3	Epithelial membrane protein 3
IMAGE:52992		Transcribed locus
IMAGE:52431	TDE1	Tumor differentially expressed 1
IMAGE:34888		**Transcribed locus
IMAGE:198312	TOMM70A	Translocase of outer mitochondrial membrane 70 homolog A (yeast)
IMAGE:345247	C2orf27	Chromosome 2 open reading frame 27
IMAGE:80146	CCL13	Chemokine (C-C motif) ligand 13
IMAGE:430928	BARD1	BRCA1 associated RING domain 1
IMAGE:48662	LOC285671	Ring finger protein 180
IMAGE:45327	ACLY	ATP citrate lyase
IMAGE:1700163	ZNF117	Zinc finger protein 117 (HPF9)
IMAGE:813661	TRIM2	Tripartite motif-containing 2
IMAGE:41672	C1orf1	CAZ-associated structural protein
IMAGE:361323	RGS1	Regulator of G-protein signalling 1
IMAGE:161204	PANX1	Pannexin 1
IMAGE:129024	FGL1	Fibrinogen-like 1
IMAGE:595307	LDHB	Lactate dehydrogenase B
IMAGE:320509	CYB5-M	Outer mitochondrial membrane cytochrome b5
IMAGE:1011585		CDNA FLJ26232 fis, clone ADG09495
IMAGE:207550	TRAM2	Translocation associated membrane protein 2
IMAGE:359285	CPA4	Carboxypeptidase A4
IMAGE:843259	TTRAP	TRAF and TNF receptor associated protein
IMAGE:1323591	SERPINA5	Serpin peptidase inhibitor, clade A (alpha-1 antiproteinase, antitrypsin), member 5
IMAGE:42452	EIF3S6	**Eukaryotic translation initiation factor 3, subunit 6 48kDa
IMAGE:137297	PGAP1	GPI deacylase
IMAGE:51029	PRKCB1	Protein kinase C, beta 1
IMAGE:731047	LEMD1	LEM domain containing 1
IMAGE:731273	CCIN	Calicin
IMAGE:51405	C6orf33	Progestin and adipoQ receptor family member VIII
IMAGE:789012	FBLN2	Fibulin 2
IMAGE:742547	TMEM31	Transmembrane protein 31
IMAGE:510116	S100P	S100 calcium binding protein P
IMAGE:970613	RAD21	RAD21 homolog (S. pombe)
IMAGE:725677	PCTK3	PCTAIRE protein kinase 3
IMAGE:1049185		Transcribed locus, strongly similar to NP_065144.1 G antigen, family D, 2 isoform 1a; XAGE-1 protein [Homo sapiens]
IMAGE:712840	STAT5B	Signal transducer and activator of transcription 5B
IMAGE:35271	NRCAM	Neuronal cell adhesion molecule
IMAGE:264166	POPDC3	Popeye domain containing 3
IMAGE:450152	MEIS4	Meis1, myeloid ecotropic viral integration site 1 homolog 4 (mouse)
IMAGE:811020	LOC157378	Transmembrane protein 65
IMAGE:243202	CTSE	Cathepsin E
IMAGE:345601	D2S448	Peroxidasin homolog (Drosophila)
IMAGE:380394	EIF1AY	Eukaryotic translation initiation factor 1A, Y-linked
IMAGE:277463	C18orf1	Chromosome 18 open reading frame 1
IMAGE:362853	PTK9	PTK9 protein tyrosine kinase 9
IMAGE:1459964	TUBA3	Tubulin, alpha 3
IMAGE:898032	ch-TOG	Cytoskeleton associated protein 5
IMAGE:129020	BCAS3	Breast carcinoma amplified sequence 3
IMAGE:206544	LOC257106	Rho GTPase activating protein 30
IMAGE:51465		Transcribed locus
IMAGE:42636	MGC16169	Hypothetical protein MGC16169
IMAGE:121722		Transcribed locus
IMAGE:40844	AKAP6	A kinase (PRKA) anchor protein 6
IMAGE:1603044	GRM8	Glutamate receptor, metabotropic 8
IMAGE:341706	BEX1	Brain expressed, X-linked 1
IMAGE:39922	DOCK3	Dedicator of cytokinesis 3
IMAGE:916038		LOC440156
IMAGE:38883	GSK3B	Glycogen synthase kinase 3 beta
IMAGE:162775	DDX5	RNA-binding protein 45 (RBP45), putative
IMAGE:139167	QKI	Quaking homolog, KH domain RNA binding (mouse)
IMAGE:1535580	AMN	Amnionless homolog (mouse)
IMAGE:137535	TIF1	Tripartite motif-containing 24
IMAGE:307873	ATP2B4	ATPase, Ca++ transporting, plasma membrane 4
IMAGE:245774	C10orf10	Chromosome 10 open reading frame 10
IMAGE:417404	ACIN1	Apoptotic chromatin condensation inducer 1
IMAGE:322641	DKFZp667B0210	Early B-cell factor 3
IMAGE:811088	EFNB3	Ephrin-B3
IMAGE:588053	LOC120224	Transmembrane protein 45B
IMAGE:183811	TNFSF10	Tumor necrosis factor (ligand) superfamily, member 10
IMAGE:742569	DOCK8	Dedicator of cytokinesis 8
IMAGE:418150	RAMP	Denticleless homolog (Drosophila)
IMAGE:529336	NLGN1	Neuroligin 1
IMAGE:109440	DEFA1	Defensin, alpha 1
IMAGE:50562	C8orf4	Chromosome 8 open reading frame 4
IMAGE:291348	CNIH	Cornichon homolog (Drosophila)
IMAGE:300920	SSH2	Slingshot homolog 2 (Drosophila)
IMAGE:856489	RRM1	Transport protein, putative
IMAGE:429811	LOC115294	Protein-L-isoaspartate (D-aspartate) O-methyltransferase domain containing 1
IMAGE:52990	SLC1A2	Solute carrier family 1 (glial high affinity glutamate transporter), member 2
IMAGE:46647		Transcribed locus
IMAGE:43229	PCNA	Proliferating cell nuclear antigen
IMAGE:510794	MYCBP	C-myc binding protein
IMAGE:2154526	JAK1	Janus kinase 1 (a protein tyrosine kinase)
IMAGE:724652	CD8B1	**CD8 antigen, beta polypeptide 1 (p37)
IMAGE:505376	FLJ12529	Pre-mRNA cleavage factor I, 59 kDa subunit
IMAGE:244754	LBR	Lamin B receptor
IMAGE:49284	FGF11	Fibroblast growth factor 11
1343726	KIAA0186	DNA replication complex GINS protein PSF1
IMAGE:49227	STXBP6	Syntaxin binding protein 6 (amisyn)
IMAGE:129502	NIN	Ninein (GSK3B interacting protein)
IMAGE:53265	NUP133	Nucleoporin 133kDa
IMAGE:322961	CAPZB	Capping protein (actin filament) muscle Z-line, beta
IMAGE:796711	COL11A1	Collagen, type XI, alpha 1
IMAGE:268354	DC-UbP	Dendritic cell-derived ubiquitin-like protein
IMAGE:50939	KIAA0523	KIAA0523 protein
IMAGE:951449	REG4	**Regenerating islet-derived family, member 4
IMAGE:1700428
IMAGE:435036	ADFP	Adipose differentiation-related protein
IMAGE:364992	FAM13A1	Family with sequence similarity 13, member A1
IMAGE:296155	CDCA5	Cell division cycle associated 5
IMAGE:289832	LOC153222	Adult retina protein
IMAGE:740885	NCBP1	**Nuclear cap binding protein subunit 1, 80kDa
IMAGE:296880	MPP1	Membrane protein, palmitoylated 1, 55kDa
IMAGE:769625	GFM2	G elongation factor, mitochondrial 2
IMAGE:1699682		Transcribed locus
IMAGE:1499925		Transcribed locus
IMAGE:206816	CECR1	Cat eye syndrome chromosome region, candidate 1
IMAGE:126413	ITIH2	Inter-alpha (globulin) inhibitor H2
IMAGE:509823	CEACAM6	Carcinoembryonic antigen-related cell adhesion molecule 6 (non-specific cross reacting antigen)
IMAGE:202194	SPTA1	Spectrin, alpha, erythrocytic 1 (elliptocytosis 2)
IMAGE:293759		LOC440461
IMAGE:844680	TRD@	T cell receptor delta locus
IMAGE:594382	ESR1	Estrogen receptor 1
IMAGE:745360	HAT1	Histone acetyltransferase 1
IMAGE:813828	KIAA0367	KIAA0367
IMAGE:49204	GDAP1	**Ganglioside-induced differentiation-associated protein 1
IMAGE:45417	KCNJ10	Potassium inwardly-rectifying channel, subfamily J, member 10
IMAGE:25838	PXMP4	Peroxisomal membrane protein 4, 24kDa
IMAGE:47586	MAP4	Microtubule-associated protein 4
IMAGE:742596	SYTL5	Synaptotagmin-like 5
IMAGE:219717	HERC2	Hect domain and RLD 2
IMAGE:257329	CMAH	Cytidine monophosphate-N-acetylneuraminic acid hydroxylase (CMP-N-acetylneuraminate monooxygenase)
IMAGE:22389	FLJ21963	FLJ21963 protein
IMAGE:383767	AOF1	Amine oxidase (flavin containing) domain 1
IMAGE:796732	FLJ14834	Hypothetical protein FLJ14834
IMAGE:731311	URB	Steroid sensitive gene 1
IMAGE:2029116	FLJ20097	Hypothetical protein FLJ20097
IMAGE:140328	SOX5	SRY (sex determining region Y)-box 5
IMAGE:253725	SNRPN	Small nuclear ribonucleoprotein polypeptide N
IMAGE:240518	SERPINA6	Serpin peptidase inhibitor, clade A (alpha-1 antiproteinase, antitrypsin), member 6
IMAGE:897767	DDX23	DEAD (Asp-Glu-Ala-Asp) box polypeptide 23
IMAGE:375716	HEG	HEG homolog 1 (zebrafish)
IMAGE:970271	ATP1A3	ATPase, Na+/K+ transporting, alpha 3 polypeptide
IMAGE:842968	BUB1B	BUB1 budding uninhibited by benzimidazoles 1 homolog beta (yeast)
IMAGE:723955	EFNB2	Ephrin-B2
IMAGE:843067	TFCP2	Transcription factor CP2
IMAGE:38783	FAM48A	**Family with sequence similarity 48, member A
IMAGE:160233	TMPO	Thymopoietin
IMAGE:429222	C20orf45	**Chromosome 20 open reading frame 45
IMAGE:531402	MCM5	MCM5 minichromosome maintenance deficient 5, cell division cycle 46 (S. cerevisiae)
IMAGE:840770	LTBP2	Latent transforming growth factor beta binding protein 2
IMAGE:562712	FLJ44896	FLJ44896 protein
IMAGE:428067	XPO7	Exportin 7
IMAGE:856174	PIK3R4	Phosphoinositide-3-kinase, regulatory subunit 4, p150
IMAGE:744360	MRPS6	Mitochondrial ribosomal protein S6
IMAGE:772304	SLC25A5	Solute carrier family 25 (mitochondrial carrier; adenine nucleotide translocator), member 5
IMAGE:629863		CDNA clone IMAGE:4830853
IMAGE:134719	ZBTB10	Zinc finger and BTB domain containing 10
IMAGE:767765	GEM	GTP binding protein overexpressed in skeletal muscle
IMAGE:753322	SYNCRIP	Synaptotagmin binding, cytoplasmic RNA interacting protein
IMAGE:34905	FNDC3B	Fibronectin type III domain containing 3B
IMAGE:50173		Transcribed locus, weakly similar to NP_061913.2 elongation protein 4 homolog; PAX6 neighbor gene; chromosome 11 open reading frame 19 [Homo sapiens]
IMAGE:271038	RGS5	Regulator of G-protein signalling 5
IMAGE:124474	WNK1	WNK lysine deficient protein kinase 1
IMAGE:840333	GPD1L	Glycerol-3-phosphate dehydrogenase 1-like
IMAGE:200263		**Similar to Apolipoprotein A-I precursor (Apo-AI)
IMAGE:182297	PANX1	Pannexin 1
IMAGE:299427	AIG1	Androgen-induced 1
IMAGE:291827	GTF3C4	General transcription factor IIIC, polypeptide 4, 90kDa
IMAGE:322553	SNX6	Sorting nexin 6
IMAGE:143846	LRP2	Low density lipoprotein-related protein 2
IMAGE:51015		Homo sapiens, clone IMAGE:3618365, mRNA
IMAGE:46916	MMP16	Matrix metallopeptidase 16 (membrane-inserted)
IMAGE:384257	2'-PDE	2'-phosphodiesterase
IMAGE:307645	PERQ1	PERQ amino acid rich, with GYF domain 1
IMAGE:701481	MX2	Myxovirus (influenza virus) resistance 2 (mouse)
IMAGE:342640	KIAA0101	KIAA0101
IMAGE:785975	F13A1	Coagulation factor XIII, A1 polypeptide
IMAGE:341821	RAB23	RAB23, member RAS oncogene family
IMAGE:297872		Transcribed locus
IMAGE:878689	MGAT1	Mannosyl (alpha-1,3-)-glycoprotein beta-1,2-N-acetylglucosaminyltransferase
IMAGE:811827	NDST1	N-deacetylase/N-sulfotransferase (heparan glucosaminyl) 1
IMAGE:625875	ERO1L	ERO1-like (S. cerevisiae)
IMAGE:109153	SUMO1	SMT3 suppressor of mif two 3 homolog 1 (yeast)
IMAGE:511909	CDH17	Cadherin 17, LI cadherin (liver-intestine)
IMAGE:753028	PCDH7	BH-protocadherin (brain-heart)
IMAGE:744388	FOXJ3	Forkhead box J3
IMAGE:768168	BMP6	Bone morphogenetic protein 6
IMAGE:24623	DHX57	DEAH (Asp-Glu-Ala-Asp/His) box polypeptide 57
IMAGE:219737	ZNF432	Zinc finger protein 432
IMAGE:136026	KIAA0998	Tubulin tyrosine ligase-like family, member 5
IMAGE:810220	MINA	MYC induced nuclear antigen
IMAGE:1046495
IMAGE:813628	SCN2B	Sodium channel, voltage-gated, type II, beta
IMAGE:724112	LOC401022	Hypothetical LOC401022
IMAGE:258761	DEPDC1B	DEP domain containing 1B
IMAGE:795297	COQ4	Coenzyme Q4 homolog (yeast)
IMAGE:813149	HIST2H2BE	Histone 2, H2be
IMAGE:379920	TK1	Thymidine kinase 1, soluble
IMAGE:52228	GRIA1	**Glutamate receptor, ionotropic, AMPA 1
IMAGE:489208	C16orf34	Chromosome 16 open reading frame 34
IMAGE:136409	DKFZp547A023	CTTNBP2 N-terminal like
IMAGE:291623	MITF	Microphthalmia-associated transcription factor
IMAGE:366481	KRT6B	Keratin 6B
IMAGE:588681	EIF3S5	**Eukaryotic translation initiation factor 3, subunit 5 epsilon, 47kDa
IMAGE:214443	CYB5-M	Outer mitochondrial membrane cytochrome b5
IMAGE:488479	TPM1	Tropomyosin 1 (alpha)
IMAGE:51918	NUP93	Nucleoporin 93kDa
IMAGE:208718	ANXA1	Annexin A1
IMAGE:789147	ENO2	Enolase 2 (gamma, neuronal)
IMAGE:588661		**Transcribed locus
IMAGE:786602	DDAH1	Dimethylarginine dimethylaminohydrolase 1
IMAGE:37980	ZIC2	Zic family member 2 (odd-paired homolog, Drosophila)
IMAGE:291057	CDKN2C	Cyclin-dependent kinase inhibitor 2C (p18, inhibits CDK4)
IMAGE:240062	SLC14A1	Solute carrier family 14 (urea transporter), member 1 (Kidd blood group)
IMAGE:768146	ARPP-21	Cyclic AMP-regulated phosphoprotein, 21 kD
1309620	LIN7A	Lin-7 homolog A (C. elegans)
IMAGE:950690	CCNA2	Cyclin A2
IMAGE:344720	GYPC	Glycophorin C (Gerbich blood group)
IMAGE:415022	NSMAF	Neutral sphingomyelinase (N-SMase) activation associated factor
IMAGE:810512	THBS1	Thrombospondin 1
IMAGE:399049	LOC283267	Hypothetical protein LOC283267
IMAGE:51378		CDNA FLJ39162 fis, clone OCBBF2002376
IMAGE:279077	FLJ21128	Hypothetical protein FLJ21128
IMAGE:726684	LAPTM4A	Lysosomal-associated protein transmembrane 4 alpha
IMAGE:2067059	PEG10	Paternally expressed 10
IMAGE:730126		CDNA FLJ30437 fis, clone BRACE2009045
IMAGE:280375	ATAD2	ATPase family, AAA domain containing 2
IMAGE:196612	MMP12	Matrix metallopeptidase 12 (macrophage elastase)
IMAGE:127751	FLJ10803	Hypothetical protein FLJ10803
IMAGE:171753		Transcribed locus
IMAGE:489794	TREM1	Triggering receptor expressed on myeloid cells 1
IMAGE:52339	TM4SF9	Tetraspanin 5
IMAGE:855390	MCM6	MCM6 minichromosome maintenance deficient 6 (MIS5 homolog, S. pombe) (S. cerevisiae)
IMAGE:46896	CYFIP2	Cytoplasmic FMR1 interacting protein 2
IMAGE:1869531		Transcribed locus
IMAGE:1031744	YWHAZ	Tyrosine 3-monooxygenase/tryptophan 5-monooxygenase activation protein, zeta polypeptide
IMAGE:233199
IMAGE:796984	CYBB	Cytochrome b-245, beta polypeptide (chronic granulomatous disease)
IMAGE:289570	NSMAF	Neutral sphingomyelinase (N-SMase) activation associated factor
IMAGE:455128	CCNF	Cyclin F
IMAGE:788566	PCP4	Purkinje cell protein 4
IMAGE:344757	C21orf45	Chromosome 21 open reading frame 45
IMAGE:160485	GUCY1A3	Guanylate cyclase 1, soluble, alpha 3
IMAGE:1155048	ATP6V1A	**ATPase, H+ transporting, lysosomal 70kDa, V1 subunit A
IMAGE:32587	NAPG	N-ethylmaleimide-sensitive factor attachment protein, gamma
IMAGE:415554	LRP8	Low density lipoprotein receptor-related protein 8, apolipoprotein e receptor
IMAGE:363916	SLC35A3	Solute carrier family 35 (UDP-N-acetylglucosamine (UDP-GlcNAc) transporter), member A3
IMAGE:489129	FBN1	Fibrillin 1 (Marfan syndrome)
IMAGE:141209	FLJ35954	Hypothetical protein FLJ35954
IMAGE:342181	BCL2	B-cell CLL/lymphoma 2
IMAGE:202897	LILRB2	Leukocyte immunoglobulin-like receptor, subfamily B (with TM and ITIM domains), member 2
IMAGE:884644	LOC388524	Similar to Laminin receptor 1
IMAGE:66406	DKFZp762E1312	Hypothetical protein DKFZp762E1312
IMAGE:730555	DNAJB1	DnaJ (Hsp40) homolog, subfamily B, member 1
IMAGE:340555	MBIP	MAP3K12 binding inhibitory protein 1
IMAGE:753982		CDNA FLJ44429 fis, clone UTERU2015653
IMAGE:52725	GALNT4	**UDP-N-acetyl-alpha-D-galactosamine:polypeptide N-acetylgalactosaminyltransferase 4 (GalNAc-T4)
IMAGE:81427	TITF1	Thyroid transcription factor 1
IMAGE:950450	RHOBTB3	Rho-related BTB domain containing 3
IMAGE:1589343	ZC3HDC6	Zinc finger CCCH-type containing 6
IMAGE:194318	NUP37	Nucleoporin 37kDa
IMAGE:725365	GAS1	Growth arrest-specific 1
IMAGE:925554	TTLL3	Tubulin tyrosine ligase-like family, member 3
IMAGE:745503	ZNF9	Zinc finger protein 9 (a cellular retroviral nucleic acid binding protein)
IMAGE:129865	STK6	Serine/threonine kinase 6
IMAGE:287749	CDC7	CDC7 cell division cycle 7 (S. cerevisiae)
IMAGE:461287	CCDC6	Coiled-coil domain containing 6
IMAGE:80186		T cell receptor beta chain (TCRB)
IMAGE:109309	GNG2	Guanine nucleotide binding protein (G protein), gamma 2
IMAGE:277163	MRPL42	Mitochondrial ribosomal protein L42
IMAGE:810711	SCD	**Stearoyl-CoA desaturase (delta-9-desaturase)
IMAGE:1010093	COG4	Component of oligomeric golgi complex 4
IMAGE:272706	SIAT10	ST3 beta-galactoside alpha-2,3-sialyltransferase 6
IMAGE:1469138	FGA	Fibrinogen alpha chain
IMAGE:684661	GLIPR1	**GLI pathogenesis-related 1 (glioma)
IMAGE:450711	CHAF1A	Chromatin assembly factor 1, subunit A (p150)
IMAGE:51749	GUCY1A3	Guanylate cyclase 1, soluble, alpha 3
IMAGE:593815	C10orf112	Chromosome 10 open reading frame 112
IMAGE:428431	PKIB	Protein kinase (cAMP-dependent, catalytic) inhibitor beta
IMAGE:430186
IMAGE:204483	ATAD2	ATPase family, AAA domain containing 2
IMAGE:768497	CCL18	Chemokine (C-C motif) ligand 18 (pulmonary and activation-regulated)
IMAGE:198104	NEK2	NIMA (never in mitosis gene a)-related kinase 2
IMAGE:324690	GREM1	Gremlin 1, cysteine knot superfamily, homolog (Xenopus laevis)
IMAGE:1031045	SLC4A3	Solute carrier family 4, anion exchanger, member 3
IMAGE:242062	APOB	Apolipoprotein B (including Ag(x) antigen)
IMAGE:244387	F11	Coagulation factor XI (plasma thromboplastin antecedent)
IMAGE:1476065	STMN1	Stathmin 1/oncoprotein 18
IMAGE:897635	LOC285431	Hypothetical protein LOC285431
IMAGE:595213	FAM49B	Family with sequence similarity 49, member B
IMAGE:731095	CDCA1	Cell division cycle associated 1
IMAGE:33045	NPY1R	Neuropeptide Y receptor Y1
IMAGE:246329
IMAGE:30170	CASP3	**Caspase 3, apoptosis-related cysteine peptidase
IMAGE:179211	GPR160	G protein-coupled receptor 160
IMAGE:132326	DACH1	Dachshund homolog 1 (Drosophila)
IMAGE:246524	CHEK1	CHK1 checkpoint homolog (S. pombe)
IMAGE:435858	RNASE6	Ribonuclease, RNase A family, k6
IMAGE:345858	CRA	Myotubularin related protein 11
IMAGE:629498	NDUFA10	NADH dehydrogenase (ubiquinone) 1 alpha subcomplex, 10, 42kDa
IMAGE:201383	BAAT	Bile acid Coenzyme A: amino acid N-acyltransferase (glycine N-choloyltransferase)
IMAGE:970591	HMGB1	High-mobility group box 1
IMAGE:49172	MMAA	Methylmalonic aciduria (cobalamin deficiency) cblA type
IMAGE:795770	LIMD1	LIM domains containing 1
IMAGE:291523
IMAGE:713145	CD44	CD44 antigen (homing function and Indian blood group system)
IMAGE:1323785	THY1	Thy-1 cell surface antigen
IMAGE:1470060	TUBA3	Tubulin, alpha 3
IMAGE:321580	GPRC5B	G protein-coupled receptor, family C, group 5, member B
IMAGE:25194		Clone 25194 mRNA sequence
IMAGE:124781	SQLE	Squalene epoxidase
IMAGE:275634	FANCD2	Fanconi anemia, complementation group D2
IMAGE:450375	H2AFB3	Trimethyllysine hydroxylase, epsilon
IMAGE:814615	MTHFD2	Methylenetetrahydrofolate dehydrogenase (NADP+ dependent) 2, methenyltetrahydrofolate cyclohydrolase
IMAGE:268778	PRKAR1A	Protein kinase, cAMP-dependent, regulatory, type I, alpha (tissue specific extinguisher 1)
IMAGE:131563	RSNL2	Restin-like 2
IMAGE:131362	MSN	Moesin
IMAGE:1521571		Transcribed locus
IMAGE:49883	SYT13	Synaptotagmin XIII
IMAGE:345538	CTSL	Cathepsin L-like 3
IMAGE:84695	FNBP1	Formin binding protein 1
IMAGE:46108	AUTS2	Autism susceptibility candidate 2
IMAGE:430297	ETV4	Ets variant gene 4 (E1A enhancer binding protein, E1AF)
IMAGE:296488
IMAGE:509569	DUSP10	Dual specificity phosphatase 10
IMAGE:187975	ARS2	Arsenate resistance protein ARS2
IMAGE:502012	MS4A4A	Membrane-spanning 4-domains, subfamily A, member 4
IMAGE:345925	KRT5	Keratin 5 (epidermolysis bullosa simplex, Dowling-Meara/Kobner/Weber-Cockayne types)
IMAGE:882506	LOXL2	Lysyl oxidase-like 2
IMAGE:307220	DKFZp434L142	Hypothetical protein DKFZp434L142
IMAGE:198820	LRFN5	Leucine rich repeat and fibronectin type III domain containing 5
IMAGE:629906	OGN	Osteoglycin (osteoinductive factor, mimecan)
IMAGE:40718		CDNA FLJ31513 fis, clone NT2RI1000127
IMAGE:50888	PRDX3	Peroxiredoxin 3
IMAGE:31837
IMAGE:505202	MYOCD	**Myocardin
IMAGE:265087	MGC45564	GTPase activating Rap/RanGAP domain-like 1
IMAGE:191904	BUB3	BUB3 budding uninhibited by benzimidazoles 3 homolog (yeast)
IMAGE:383676	PCDHB5	Protocadherin beta 5
IMAGE:490600	FOSL2	FOS-like antigen 2
IMAGE:1416117	DRD2	Dopamine receptor D2
IMAGE:795758	DKFZP434B044	Cysteine-rich secretory protein LCCL domain containing 2
IMAGE:1155481	TUSC3	Tumor suppressor candidate 3
IMAGE:897884	KIAA1573	Cache domain containing 1
IMAGE:771318		Similar to Serine/threonine-protein kinase PRKX (Protein kinase PKX1)
IMAGE:1091502	COL5A2	Collagen, type V, alpha 2
IMAGE:243238	YWHAZ	Tyrosine 3-monooxygenase/tryptophan 5-monooxygenase activation protein, zeta polypeptide
IMAGE:154354		Transcribed locus, moderately similar to XP_515482.1 PREDICTED: hypothetical protein XP_515482 [Pan troglodytes]
IMAGE:453107	CDC45L	CDC45 cell division cycle 45-like (S. cerevisiae)
IMAGE:128301	PRKCBP1	Protein kinase C binding protein 1
IMAGE:80221	CPA3	Carboxypeptidase A3 (mast cell)
IMAGE:767113	C10orf18	Chromosome 10 open reading frame 18
IMAGE:451907	ZWINT	ZW10 interactor antisense
IMAGE:490763	IREB2	Iron-responsive element binding protein 2
IMAGE:713696	TIMP1	TIMP metallopeptidase inhibitor 1
IMAGE:435076	CENPF	Centromere protein F, 350/400ka (mitosin)
IMAGE:1584391
IMAGE:786194	DCK	Deoxycytidine kinase
IMAGE:796624	LGR5	Leucine-rich repeat-containing G protein-coupled receptor 5
IMAGE:194297	HPS5	Hermansky-Pudlak syndrome 5
IMAGE:340745		CDNA FLJ31683 fis, clone NT2RI2005353
IMAGE:26616	RPA2	Replication protein A2, 32kDa
IMAGE:357373	DLG7	Discs, large homolog 7 (Drosophila)
IMAGE:1522718	SCUBE3	Signal peptide, CUB domain, EGF-like 3
IMAGE:823811	NRP2	Neuropilin 2
IMAGE:841207	ITGB6	Integrin, beta 6
IMAGE:31873	HMGN4	High mobility group nucleosomal binding domain 4
IMAGE:246041	MRPS35	Mitochondrial ribosomal protein S35
IMAGE:85690	SERPIND1	Serpin peptidase inhibitor, clade D (heparin cofactor), member 1
IMAGE:810727	CLIC5	Chloride intracellular channel 5
IMAGE:111735	PYGL	Phosphorylase, glycogen; liver (Hers disease, glycogen storage disease type VI)
IMAGE:79254	HCP5	HLA complex P5
IMAGE:305227	ABI2	Abl interactor 2
IMAGE:125092	GALGT	UDP-N-acetyl-alpha-D-galactosamine:(N-acetylneuraminyl)-galactosylglucosylceramide N-acetylgalactosaminyltransferase (GalNAc-T)
IMAGE:1472152		Ig rearranged mu heavy chain mRNA V-region (V-D-J) from B-cell hybridoma cell line 21/28
IMAGE:290422	ZA20D2	Zinc finger, A20 domain containing 2
IMAGE:826984	CR2	Complement component (3d/Epstein Barr virus) receptor 2
IMAGE:357031	TNFAIP6	Tumor necrosis factor, alpha-induced protein 6
IMAGE:53158	PFKFB2	6-phosphofructo-2-kinase/fructose-2,6-biphosphatase 2
IMAGE:46355	DNAH3	**Dynein, axonemal, heavy polypeptide 3
IMAGE:241160	NR1H4	Nuclear receptor subfamily 1, group H, member 4
IMAGE:759163	MFAP4	Microfibrillar-associated protein 4
IMAGE:236413	NALP2	NACHT, leucine rich repeat and PYD containing 2
IMAGE:251685	CDH11	Cadherin 11, type 2, OB-cadherin (osteoblast)
IMAGE:430231		LQK1 hypothetical protein long isoform (LQK1) mRNA, complete cds, alternatively spliced
IMAGE:510069	TMPRSS4	Transmembrane protease, serine 4
IMAGE:856427	TRIP13	Thyroid hormone receptor interactor 13
IMAGE:79240	HUNK	Hormonally upregulated Neu-associated kinase
IMAGE:149544	NET1	Neuroepithelial cell transforming gene 1
IMAGE:505881	ADA	Adenosine deaminase
IMAGE:753400	ACTL6A	Actin-like 6A
IMAGE:742952	BUB3	BUB3 budding uninhibited by benzimidazoles 3 homolog (yeast)
IMAGE:415769		**Transcribed locus
IMAGE:783721	SEPT8	Septin 8
IMAGE:754380	MTMR2	Myotubularin related protein 2
IMAGE:123264	CD38	CD38 antigen (p45)
IMAGE:364077	ARS2	Arsenate resistance protein ARS2
IMAGE:754628	HIST2H2AA	Histone 2, H2aa
IMAGE:207358	SLC2A1	Solute carrier family 2 (facilitated glucose transporter), member 1
IMAGE:46862	CIT	Citron (rho-interacting, serine/threonine kinase 21)
IMAGE:204214	CDC6	CDC6 cell division cycle 6 homolog (S. cerevisiae)
IMAGE:284882	COL2A1	Collagen, type II, alpha 1 (primary osteoarthritis, spondyloepiphyseal dysplasia, congenital)
IMAGE:138369	FCGR2B	Fc fragment of IgG, low affinity IIc, receptor for (CD32)
IMAGE:23819	ABCG1	ATP-binding cassette, sub-family G (WHITE), member 1
IMAGE:324672	ELL2	Elongation factor, RNA polymerase II, 2
IMAGE:41888
IMAGE:796598	LCMT1	Leucine carboxyl methyltransferase 1
IMAGE:429678	SLC40A1	Solute carrier family 40 (iron-regulated transporter), member 1
IMAGE:78921	ASPN	Asporin (LRR class 1)
IMAGE:854701	LIPA	Lipase A, lysosomal acid, cholesterol esterase (Wolman disease)
IMAGE:26418	EDG1	Endothelial differentiation, sphingolipid G-protein-coupled receptor, 1
IMAGE:306901	C5orf13	Chromosome 5 open reading frame 13
IMAGE:34140	GCA	Grancalcin, EF-hand calcium binding protein
IMAGE:1492847	TBC1D1	TBC1 (tre-2/USP6, BUB2, cdc16) domain family, member 1
IMAGE:129032	SERPINA5	Serpin peptidase inhibitor, clade A (alpha-1 antiproteinase, antitrypsin), member 5
IMAGE:238821	PLA2G7	Phospholipase A2, group VII (platelet-activating factor acetylhydrolase, plasma)
IMAGE:926239	C10orf99	Chromosome 10 open reading frame 99
IMAGE:853809	RGS5	Regulator of G-protein signalling 5
IMAGE:898396	RNF40	**Ring finger protein 40
IMAGE:73784	ITGA6	Integrin, alpha 6
IMAGE:566760	DR1	Down-regulator of transcription 1, TBP-binding (negative cofactor 2)
IMAGE:249603	STK39	Serine threonine kinase 39 (STE20/SPS1 homolog, yeast)
IMAGE:285377	PELI2	Pellino homolog 2 (Drosophila)
IMAGE:244058	CDCA7	Cell division cycle associated 7
IMAGE:898195	MYEF2	Myelin expression factor 2
IMAGE:137655	RIF1	Chromosome 1 open reading frame 103
IMAGE:293032	TFAP2A	Transcription factor AP-2 alpha (activating enhancer binding protein 2 alpha)
IMAGE:306726	ROBO2	Roundabout, axon guidance receptor, homolog 2 (Drosophila)
IMAGE:275871	NAP1L1	60S ribosomal protein L6 (RPL6A)
IMAGE:136070	DKFZP586A0522	DKFZP586A0522 protein
IMAGE:299570		**Hypothetical LOC158730
IMAGE:280249	KLF7	Kruppel-like factor 7 (ubiquitous)
IMAGE:587333	C20orf177	Chromosome 20 open reading frame 177
IMAGE:259819	KCTD10	Potassium channel tetramerisation domain containing 10
IMAGE:359191	HSPB8	Heat shock 22kDa protein 8
IMAGE:811069	ESCO2	Establishment of cohesion 1 homolog 2 (S. cerevisiae)
IMAGE:868380	FCGR2A	Fc fragment of IgG, low affinity IIa, receptor (CD32)
IMAGE:179042	LOC90624	Hypothetical protein LOC90624
IMAGE:898286	CDC2	Cell division cycle 2, G1 to S and G2 to M
IMAGE:815526	MYBL2	V-myb myeloblastosis viral oncogene homolog (avian)-like 2
IMAGE:359457	TAGLN	Transgelin
IMAGE:753198	CDCA7	Cell division cycle associated 7
IMAGE:823851	AEBP1	AE binding protein 1
IMAGE:729942	SPRR2C	Small proline-rich protein 2C
IMAGE:205049	HSPB8	Heat shock 22kDa protein 8
IMAGE:452374	ORM1	Orosomucoid 1
IMAGE:50302	LOC57168	Similar to aspartate beta hydroxylase (ASPH)
IMAGE:139705		Similar to RIKEN cDNA 2410129H14
IMAGE:140792	LOC115749	Hypothetical protein LOC115749
IMAGE:416309	ZNF505	Zinc finger protein 505
IMAGE:306921	EEF1E1	Eukaryotic translation elongation factor 1 epsilon 1
IMAGE:141677	PSG5	Pregnancy specific beta-1-glycoprotein 5
IMAGE:300958		Transcribed locus, weakly similar to NP_060312.1 hypothetical protein FLJ20489 [Homo sapiens]
IMAGE:279905	SPG20	Spastic paraplegia 20, spartin (Troyer syndrome)
IMAGE:193883	GMNN	Geminin, DNA replication inhibitor
IMAGE:810235	FRS2	Fibroblast growth factor receptor substrate 2
IMAGE:151405	SLC7A11	Solute carrier family 7, (cationic amino acid transporter, y+ system) member 11
IMAGE:460114	UTRN	Utrophin (homologous to dystrophin)
IMAGE:1076422	MUC13	Mucin 13, epithelial transmembrane
IMAGE:1567721	ZNF134	**Zinc finger protein 134 (clone pHZ-15)
IMAGE:810911	SLC34A2	Solute carrier family 34 (sodium phosphate), member 2
IMAGE:950886	GNG2	**Guanine nucleotide binding protein (G protein), gamma 2
IMAGE:838872	DKK2	Dickkopf homolog 2 (Xenopus laevis)
IMAGE:50114	PCDHA6	Protocadherin alpha subfamily C, 1
IMAGE:2028966	C20orf13	Chromosome 20 open reading frame 13
IMAGE:131316		**Transcribed locus, moderately similar to NP_780591.1 hypothetical protein LOC108900 [Mus musculus]
IMAGE:714043	EMP1	Epithelial membrane protein 1
IMAGE:731373	SNTB1	Syntrophin, beta 1 (dystrophin-associated protein A1, 59kDa, basic component 1)
IMAGE:309288	RFC4	Replication factor C (activator 1) 4, 37kDa
IMAGE:811162	FMOD	Fibromodulin
IMAGE:590253	KIAA1333	KIAA1333
IMAGE:624754	CBFB	Core-binding factor, beta subunit
IMAGE:134783	COL11A1	Collagen, type XI, alpha 1
IMAGE:277042	STXBP6	Syntaxin binding protein 6 (amisyn)
IMAGE:292219	IF	I factor (complement)
IMAGE:213871	GNAS	GNAS complex locus
IMAGE:43865	DNCI1	Dynein, cytoplasmic, intermediate polypeptide 1
IMAGE:262023	STK4	Serine/threonine kinase 4
IMAGE:590774	MAPK13	Mitogen-activated protein kinase 13
IMAGE:487722	B3GNT5	UDP-GlcNAc:betaGal beta-1,3-N-acetylglucosaminyltransferase 5
IMAGE:48033		Transcribed locus
IMAGE:1568882	TGFB1I4	TSC22 domain family, member 1
IMAGE:382564	FOXD1	Forkhead box D1
IMAGE:35812	PCLO	Piccolo (presynaptic cytomatrix protein)
IMAGE:825470	TOP2A	Topoisomerase (DNA) II alpha 170kDa
IMAGE:212429	TF	Transferrin
IMAGE:280954	CNTN3	Contactin 3 (plasmacytoma associated)
IMAGE:772912	GPSM1	G-protein signalling modulator 1 (AGS3-like, C. elegans)
IMAGE:134422
IMAGE:586796	KRT20	Keratin 20
IMAGE:681906	FGR	Gardner-Rasheed feline sarcoma viral (v-fgr) oncogene homolog
IMAGE:1739569		Homo sapiens, clone IMAGE:4690669, mRNA
IMAGE:211758		CDNA: FLJ22256 fis, clone HRC02860
IMAGE:782476	GULP1	GULP, engulfment adaptor PTB domain containing 1
IMAGE:137275	INPP5E	Inositol polyphosphate-5-phosphatase, 72 kDa
IMAGE:247925	DRIM	Down-regulated in metastasis
IMAGE:38816	TUBA1	**Tubulin, alpha 1 (testis specific)
IMAGE:112576	BCCIP	**BRCA2 and CDKN1A interacting protein
IMAGE:136933		Transcribed locus
IMAGE:796542	ETV5	Ets variant gene 5 (ets-related molecule)
IMAGE:564569	IGSF4	Immunoglobulin superfamily, member 4
IMAGE:122397	MTB	Leucine zipper protein 5
IMAGE:206632	APOB	Apolipoprotein B (including Ag(x) antigen)
IMAGE:488130	SYNPO2	Synaptopodin 2
IMAGE:813426	TRIB2	Tribbles homolog 2 (Drosophila)
IMAGE:796754	DREV1	DORA reverse strand protein 1
IMAGE:472008	CCR1	Chemokine (C-C motif) receptor 1
IMAGE:123724	FLJ23467	Tumor necrosis factor, alpha-induced protein 8-like 2
IMAGE:346583	LPHN2	Latrophilin 2
IMAGE:121727	GPAM	Glycerol-3-phosphate acyltransferase, mitochondrial
IMAGE:511586	HNRPA1	Heterogeneous nuclear ribonucleoprotein A1
IMAGE:196303	CDCA1	Cell division cycle associated 1
IMAGE:927208	C10orf99	Chromosome 10 open reading frame 99
IMAGE:502397	STK24	Serine/threonine kinase 24 (STE20 homolog, yeast)
IMAGE:132203	DNAJC3	Hypothetical protein LOC144871
IMAGE:725268	LOC440712	Chromosome 1 open reading frame 186
IMAGE:204614	EIF4A1	Eukaryotic translation initiation factor 4A, isoform 1
IMAGE:203437	FLJ25067	Hypothetical protein FLJ25067
IMAGE:925762	KIAA1833	Hypothetical protein KIAA1833
IMAGE:626326	UBE3A	**Ubiquitin protein ligase E3A (human papilloma virus E6-associated protein, Angelman syndrome)
IMAGE:725454	CKS2	CDC28 protein kinase regulatory subunit 2
IMAGE:79412	C5orf4	Chromosome 5 open reading frame 4
IMAGE:811095	XPO5	Exportin 5
IMAGE:810612	S100A11	S100 calcium binding protein A11 (calgizzarin)
IMAGE:897641	HNRPU	**Heterogeneous nuclear ribonucleoprotein U (scaffold attachment factor A)
IMAGE:884301	NPM1	Nucleophosmin (nucleolar phosphoprotein B23, numatrin)
IMAGE:230235	GTPBP4	GTP binding protein 4
IMAGE:362926	PRKACB	Protein kinase, cAMP-dependent, catalytic, beta
IMAGE:392366	FBXO45	F-box protein 45
IMAGE:785549	FMNL2	Formin-like 2
IMAGE:363103	HMGB2	High-mobility group box 2
IMAGE:159487	TRIM8	Tripartite motif-containing 8
IMAGE:842839	DREV1	DORA reverse strand protein 1
IMAGE:297178	FLJ23311	E2F transcription factor 8
IMAGE:433155	F5	Coagulation factor V (proaccelerin, labile factor)
IMAGE:205490	PPP2R1B	Protein phosphatase 2 (formerly 2A), regulatory subunit A (PR 65), beta isoform
IMAGE:767277	PPIH	Peptidyl prolyl isomerase H (cyclophilin H)
IMAGE:47384	MTHFD1	Methylenetetrahydrofolate dehydrogenase (NADP+ dependent) 1, methenyltetrahydrofolate cyclohydrolase, formyltetrahydrofolate synthetase
IMAGE:141453	PRLR	Prolactin receptor
IMAGE:487400	TP53RK	TP53 regulating kinase
IMAGE:325375	SYNPO2	Synaptopodin 2
IMAGE:460487	LTF	Lactotransferrin
IMAGE:781766	TMEFF1	Transmembrane protein with EGF-like and two follistatin-like domains 1
IMAGE:240663	SERPINA2	Serpin peptidase inhibitor, clade A (alpha-1 antiproteinase, antitrypsin), member 2
IMAGE:221707	DDIT4	DNA-damage-inducible transcript 4
IMAGE:428412	GZMK	Granzyme K (granzyme 3; tryptase II)
IMAGE:450949	CBLB	Cas-Br-M (murine) ecotropic retroviral transforming sequence b
IMAGE:206994	INADL	InaD-like (Drosophila)
IMAGE:433544	LECT2	Leukocyte cell-derived chemotaxin 2
IMAGE:281659	PDE1A	Phosphodiesterase 1A, calmodulin-dependent
IMAGE:340864	LY6G6C	Lymphocyte antigen 6 complex, locus G6C
IMAGE:530954	CFL2	Cofilin 2 (muscle)
IMAGE:686172	DLG7	Discs, large homolog 7 (Drosophila)
IMAGE:724888	CYP4B1	Cytochrome P450, family 4, subfamily B, polypeptide 1
IMAGE:265853	ANTXR1	Anthrax toxin receptor 1
IMAGE:179276	FASN	Fatty acid synthase
IMAGE:785933	SRPX	Sushi-repeat-containing protein, X-linked
IMAGE:810367	BEX2	Brain expressed X-linked 2
IMAGE:41558	KIAA1337	Patched domain containing 2
IMAGE:811603	ATP6V1G1	ATPase, H+ transporting, lysosomal 13kDa, V1 subunit G isoform 1
IMAGE:797000	TERE1	UbiA prenyltransferase domain containing 1
IMAGE:196860	DNALI1	Dynein, axonemal, light intermediate polypeptide 1
IMAGE:363575	MYCBP	**C-myc binding protein
IMAGE:198982	DNMT2	DNA (cytosine-5-)-methyltransferase 2
IMAGE:729924	CPXM2	Carboxypeptidase X (M14 family), member 2
IMAGE:24884	CNTN1	Contactin 1
IMAGE:307050	PPARGC1A	Peroxisome proliferative activated receptor, gamma, coactivator 1, alpha
IMAGE:812244	CKLF	Chemokine-like factor
IMAGE:201030	KIAA1573	Cache domain containing 1
IMAGE:1601959		Transcribed locus
IMAGE:50566	KCTD10	Potassium channel tetramerisation domain containing 10
IMAGE:366815	SOX4	SRY (sex determining region Y)-box 4
IMAGE:365826	GAS1	Growth arrest-specific 1
IMAGE:859478	ITGB3	Integrin, beta 3 (platelet glycoprotein IIIa, antigen CD61)
IMAGE:773422	PMP2	Peripheral myelin protein 2
IMAGE:269224		CDNA FLJ41454 fis, clone BRSTN2011597
IMAGE:784959	NEO1	Neogenin homolog 1 (chicken)
IMAGE:197067
IMAGE:127648	CD36	CD36 antigen (collagen type I receptor, thrombospondin receptor)
IMAGE:191882	FLJ20701	Hypothetical protein FLJ20701
IMAGE:758332	SHCBP1	SHC SH2-domain binding protein 1
IMAGE:155575	EPB41L1	Erythrocyte membrane protein band 4.1-like 1
IMAGE:271076	ZBTB10	Zinc finger and BTB domain containing 10
IMAGE:509943	DKC1	Dyskeratosis congenita 1, dyskerin
IMAGE:665356	TNFRSF11B	Tumor necrosis factor receptor superfamily, member 11b (osteoprotegerin)
IMAGE:197525	FMO5	Chaperonin containing TCP1, subunit 8 (theta)
IMAGE:416981	CACYBP	Calcyclin binding protein
IMAGE:842818	KARS	Lysyl-tRNA synthetase
IMAGE:269787	L1CAM	L1 cell adhesion molecule
IMAGE:231718	CLSTN1	Calsyntenin 1
IMAGE:796170	PDE5A	Phosphodiesterase 5A, cGMP-specific
IMAGE:1031363	BIRC6	Baculoviral IAP repeat-containing 6 (apollon)
IMAGE:254029	MST4	Mst3 and SOK1-related kinase
IMAGE:133534	DSC3	Desmocollin 3
IMAGE:327245	CGI-121	CGI-121 protein
IMAGE:1699281	TUSC3	Tumor suppressor candidate 3
IMAGE:249562	ZBTB10	Zinc finger and BTB domain containing 10
IMAGE:647420	MGC3731	Hypothetical protein MGC3731
IMAGE:813586	GMNN	Geminin, DNA replication inhibitor
IMAGE:503617	CXCL9	Chemokine (C-X-C motif) ligand 9
IMAGE:209518		CDNA FLJ25860 fis, clone CBR01771
IMAGE:1871074		**Transcribed locus
IMAGE:264117	CTSD	Cathepsin D (lysosomal aspartyl peptidase)
IMAGE:292881	CPSF2	Cleavage and polyadenylation specific factor 2, 100kDa
IMAGE:177074	ZIC2	Zic family member 2 (odd-paired homolog, Drosophila)
IMAGE:151597	OSBPL10	Oxysterol binding protein-like 10
IMAGE:810761	CLDN10	Claudin 10
IMAGE:295446	MAF	**V-maf musculoaponeurotic fibrosarcoma oncogene homolog (avian)
IMAGE:768344	TYRP1	Tyrosinase-related protein 1
IMAGE:547247	STC1	Stanniocalcin 1
IMAGE:197914
IMAGE:796323	ADD3	Adducin 3 (gamma)
IMAGE:1374442
IMAGE:700792	CDKN3	Cyclin-dependent kinase inhibitor 3 (CDK2-associated dual specificity phosphatase)
IMAGE:42584
IMAGE:1636226	SALL1	Sal-like 1 (Drosophila)
IMAGE:1472788	TRPA1	Transient receptor potential cation channel, subfamily A, member 1
IMAGE:343737	TCF4	Transcription factor 4
IMAGE:773322	SHOX2	Short stature homeobox 2
IMAGE:155445	AHSA2	**AHA1, activator of heat shock 90kDa protein ATPase homolog 2 (yeast)
IMAGE:1423100	CLECSF5	C-type lectin domain family 5, member A
IMAGE:47080	FLJ10996	Hypothetical protein FLJ10996
IMAGE:260052	HCLS1	Hematopoietic cell-specific Lyn substrate 1
IMAGE:1474174	MMP2	Matrix metallopeptidase 2 (gelatinase A, 72kDa gelatinase, 72kDa type IV collagenase)
IMAGE:665774	EIF4E	**Eukaryotic translation initiation factor 4E
IMAGE:74054	HAMP	Hepcidin antimicrobial peptide
IMAGE:756272	TCF7	Transcription factor 7 (T-cell specific, HMG-box)
IMAGE:856535	MTHFD1	Methylenetetrahydrofolate dehydrogenase (NADP+ dependent) 1, methenyltetrahydrofolate cyclohydrolase, formyltetrahydrofolate synthetase
IMAGE:298746	MGC17839	Hypothetical protein MGC17839
IMAGE:153760	EPHB1	EPH receptor B1
IMAGE:52303	COLM	Gliomedin
IMAGE:485985	ACTA2	Actin, alpha 2, smooth muscle, aorta
IMAGE:392630	SLITRK6	SLIT and NTRK-like family, member 6
IMAGE:233666	ROD1	ROD1 regulator of differentiation 1 (S. pombe)
IMAGE:260336	ORC3L	Origin recognition complex, subunit 3-like (yeast)
IMAGE:81289	ACTG2	Actin, gamma 2, smooth muscle, enteric
IMAGE:1371759	CUGBP2	CUG triplet repeat, RNA binding protein 2
IMAGE:32516	PPP1R14C	Protein phosphatase 1, regulatory (inhibitor) subunit 14C
IMAGE:265694	OLFML2B	Olfactomedin-like 2B
IMAGE:324815	PLCB4	Phospholipase C, beta 4
IMAGE:897987	NDUFA9	NADH dehydrogenase (ubiquinone) 1 alpha subcomplex, 9, 39kDa
IMAGE:359504	DKFZp761L1417	Hypothetical protein DKFZp761L1417
IMAGE:1591076	RANBP5	RAN binding protein 5
IMAGE:813635	ARG1	Arginase, liver
IMAGE:768454	CPEB4	Cytoplasmic polyadenylation element binding protein 4
IMAGE:279269		MRNA; cDNA DKFZp686N1345 (from clone DKFZp686N1345)
IMAGE:133895	FAM46A	Family with sequence similarity 46, member A
IMAGE:283995	UBE3A	Ubiquitin protein ligase E3A (human papilloma virus E6-associated protein, Angelman syndrome)
IMAGE:156330	RPIA	Ribose 5-phosphate isomerase A (ribose 5-phosphate epimerase)
IMAGE:756405	ID3	Inhibitor of DNA binding 3, dominant negative helix-loop-helix protein
IMAGE:564847	FLJ34048	Hypothetical protein FLJ34048
IMAGE:814287	XRCC3	X-ray repair complementing defective repair in Chinese hamster cells 3
IMAGE:753195	C5orf4	Chromosome 5 open reading frame 4
IMAGE:160573	TGFBRAP1	Transforming growth factor, beta receptor associated protein 1
IMAGE:162308	CYYR1	Cysteine/tyrosine-rich 1
IMAGE:243816	CD36	CD36 antigen (collagen type I receptor, thrombospondin receptor)
IMAGE:141314	LMCD1	LIM and cysteine-rich domains 1
IMAGE:294089	HPS4	Hermansky-Pudlak syndrome 4
IMAGE:1161662	MUC13	Mucin 13, epithelial transmembrane
IMAGE:126650	RAMP	Denticleless homolog (Drosophila)
IMAGE:142944	FAM46A	Family with sequence similarity 46, member A
IMAGE:1871243		Full length insert cDNA clone YP08F12
IMAGE:501934	PPP1CC	Protein phosphatase 1, catalytic subunit, gamma isoform
IMAGE:269411		Hypothetical gene supported by AL713796
IMAGE:788541	SLC38A1	Solute carrier family 38, member 1
IMAGE:122194	CCT4	Chaperonin containing TCP1, subunit 4 (delta)
IMAGE:925594	TTLL3	Tubulin tyrosine ligase-like family, member 3
IMAGE:562409	NDUFS5	NADH dehydrogenase (ubiquinone) Fe-S protein 5, 15kDa (NADH-coenzyme Q reductase)
IMAGE:415851	ARHE	Rho family GTPase 3
IMAGE:281949	PIP3-E	Phosphoinositide-binding protein PIP3-E
IMAGE:857595		MRNA; cDNA DKFZp434I1226 (from clone DKFZp434I1226)
IMAGE:428272	FLJ21439	Hypothetical protein FLJ21439
IMAGE:587268		Full-length cDNA clone CS0DK005YO12 of HeLa cells Cot 25-normalized of Homo sapiens (human)
IMAGE:320794	FAM36A	Family with sequence similarity 36, member A
**cDNA maps to multiple UniGene cluster
